# Supplementary material
Source: publisher site journal article supplement (https://www.dovepress.com/article/438229)
Supplement: Supplementary file 1 [file get_supplementary_file.php]

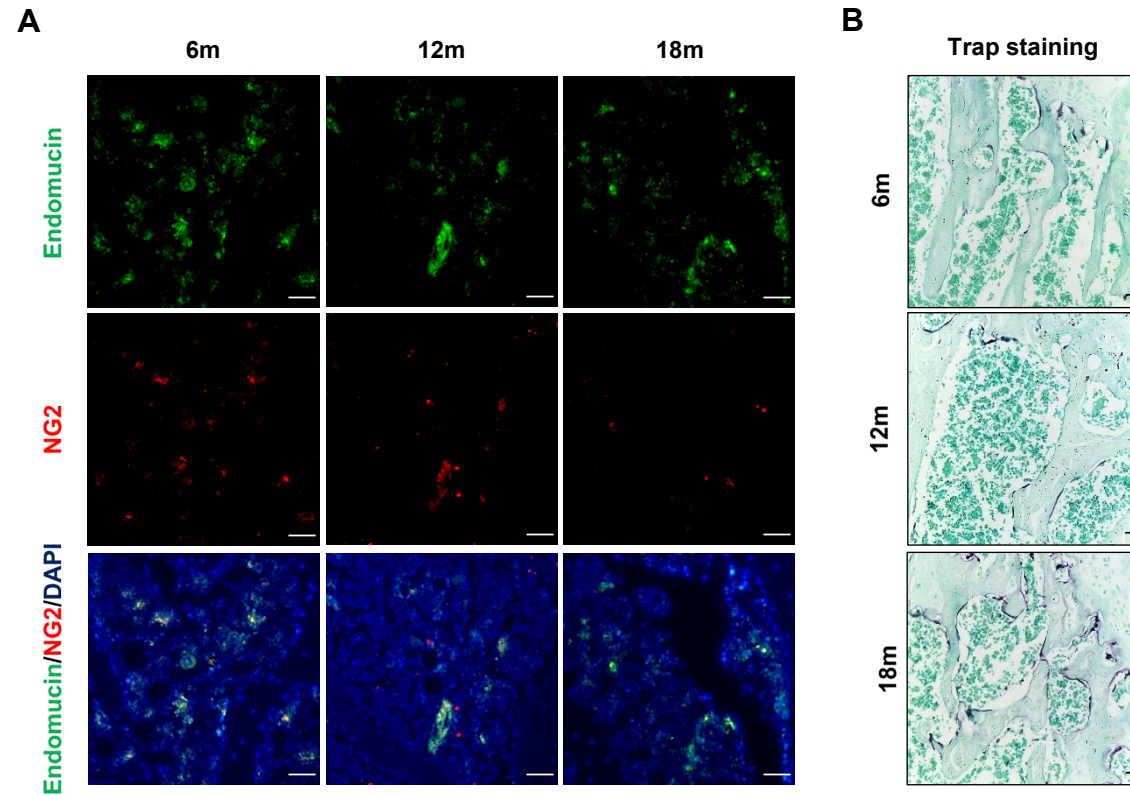

**Fig. S1 low pericyte coverage is related to enhanced bone resorption**

**A** Representative immunostaining images of femurs from female wild-type mice of different ages (6, 12 and 18 months). NG2<sup>+</sup> (red) pericytes, endomucin<sup>+</sup> (green) endothelial cell, and nuclear (blue) DAPI staining. Scale bar, 50  $\mu$ m. **B** Representative TRAP staining images of femurs from female wild-type mice of different ages (6, 12 and 18 months). Scale bar, 50  $\mu$ m.

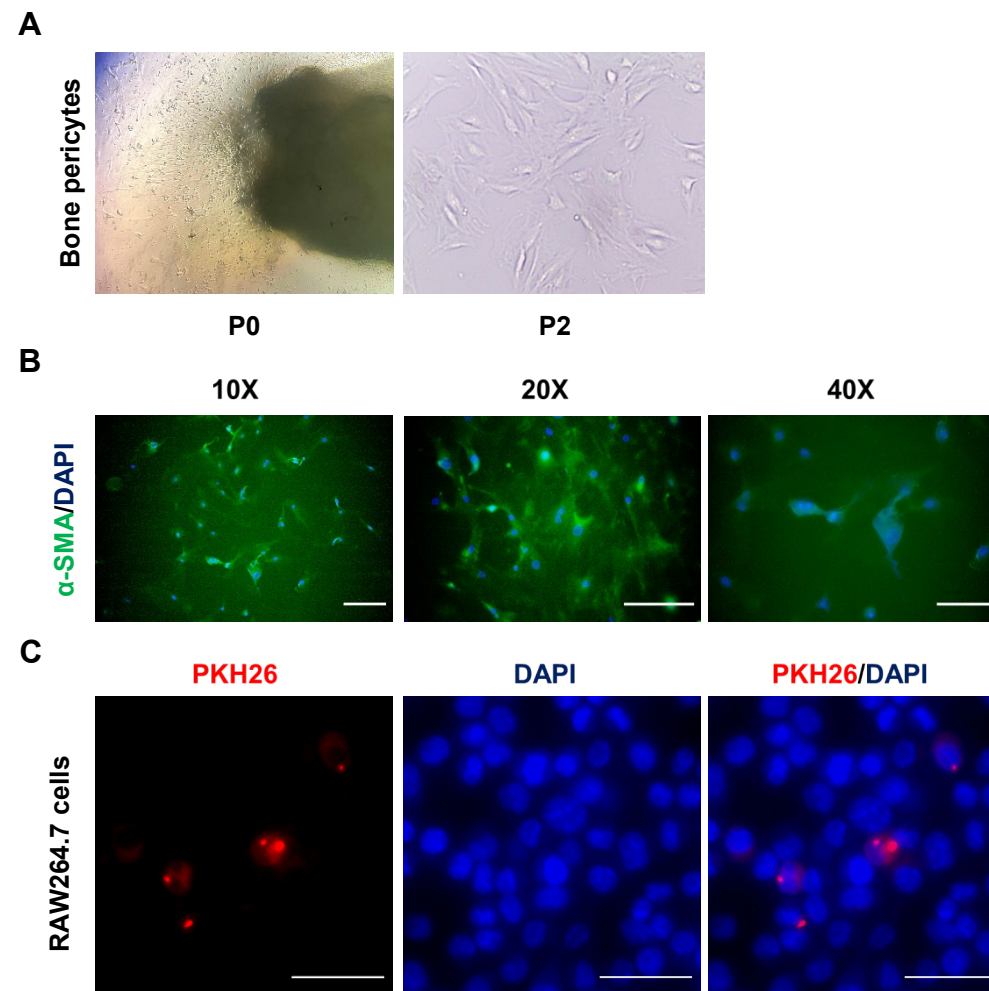

**Fig. S2 Isolation, culture, and identification of mouse femoral pericytes**

**A** pericytes from mouse femur were isolated and cultured. **B** Pericyte surface marker  $\alpha$ -smooth muscle actin (green) was detected by immunofluorescence assay. DAPI was used for nuclear (blue) staining. Scale bar, 100 $\mu$ m (10X, 20X), 50 $\mu$ m (40X). **C** Absorption of PC-EVs by RAW264.7 cells. PC-EVs were PKH26 (red)-labeled before being cultivated with pericytes for 12 hours. Nuclear (blue) was stained with DAPI. Scale bar, 50  $\mu$ m.

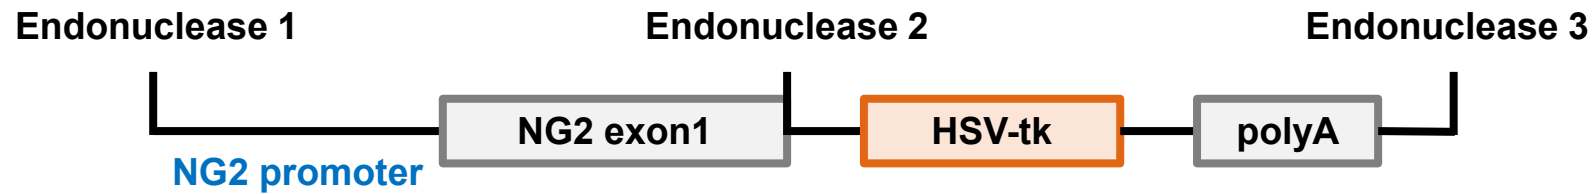

**Fig. S3 Generation of NG2-tk transgenic mice**

The thymidine kinase of herpes simplex virus (HSV-tk) fragment and NG2 promoter were digested by endonuclease and ligated together. Subsequently, the NG2-tk mouse was developed by a transgenic facility on the FVB background.

**Table S1 Antibody for immunofluorescence assay and western blotting analysis**

| <b>Antibody</b> | <b>Brand</b>                     | <b>Dilution</b>    | <b>Applicat<br/>ion</b> | <b>Catalog<br/>number</b> |
|-----------------|----------------------------------|--------------------|-------------------------|---------------------------|
| anti-Endomucin  | Invitrogen,<br>Carlsbad, CA, USA | 1:1000             | IF                      | 14-5851-81                |
| anti-NG2        | Chemicon,<br>Temecula, CA, USA   | 1:500              | IF                      | AB5320                    |
| anti-Calnexin   | Affinity, Jiangsu, China         | 1:1000             | WB                      | AF5362                    |
| anti-CD9        | Affinity                         | 1:1000             | WB                      | AF5139                    |
| anti-CD81       | Affinity                         | 1:1000             | WB                      | DF2306                    |
| anti-CD63       | Affinity                         | 1:1000             | WB                      | AF5117                    |
| anti-CTSK       | Affinity                         | 1:1000             | WB                      | DF6614                    |
| anti-Traf3      | Affinity                         | 1:1000             | WB                      | AF5380                    |
| anti-TRAP       | Affinity                         | 1:1000             | WB                      | DF2301                    |
| anti-NIK        | Affinity                         | 1:1000             | WB                      | DF2335                    |
| anti-P100/P52   | Affinity                         | 1:1000             | WB                      | AF6373                    |
| anti-RelB       | Affinity                         | 1:1000             | WB                      | AF6380                    |
| anti-GAPDH      | Affinity                         | 1:10000            | WB                      | AF7021                    |
| Anti-rat IgG    | Zenbio, Sichuan, China           | 1:1000             | IF                      | 550067                    |
| Anti-rabbit IgG | Servicebio, Hubei, China         | 1:10000;<br>1:1000 | WB;<br>IF               | GB21303                   |

**Table S2 SiRNA sequences for cell transfection**

| <b>Gene</b>  | <b>Sequence</b>             |
|--------------|-----------------------------|
| <i>Traf3</i> | GCG UGC CGA CUG CAA AGA ATT |
| <i>NC</i>    | UUC UCC GAA CGU GUC ACG UTT |

Synthesized by IBSBio (Shanghai, China).

**Table S3 Primer sequences for Quantitative real-time PCR**

| <b>Gene</b>  | <b>Sequence</b>                                                |
|--------------|----------------------------------------------------------------|
| <i>Traf3</i> | F: 5'-TGAGCTGGAGAGCGTAGACA-3'<br>R: 5'-AGATCAGCACCCCGTTGTAG-3' |
| <i>GAPDH</i> | F: 5'-AACTTTGGCATTGTGGAAGG-3'<br>R: 5'-ACACATTGGGGGTAGGAACA-3' |

Synthesized by Shenggong (Shanghai, China).
